# Supplementary material for: Mitochondria-Targeting Polymer Micelles in Stepwise Response Releasing Gemcitabine and Destroying the Mitochondria and Nucleus for Combined Antitumor Chemotherapy
Source: MDPI journal article supplement (doi:10.3390/ijms232012624), 2022-10-20
Supplement: s1 [file s1]

# Mitochondria-targeting polymer micelles stepwise response releasing gemcitabine destroying mitochondria and nucleus for combined antitumor chemotherapy

Shanming Zhang<sup>a</sup>, Fen Zheng<sup>a</sup>, Kaige Liu<sup>a</sup>, Shengke Liu<sup>a</sup>, Tonghu Xiao<sup>a</sup>, Yabin Zhu<sup>b</sup> and Long Xu<sup>a\*</sup>

<sup>a</sup>Key Laboratory of Advanced Mass Spectrometry and Molecular Analysis of Zhejiang Province,  
School of Materials Science and Chemical Engineering, Ningbo University, Ningbo, 315211,  
China

<sup>b</sup>School of medicine, Ningbo University, Ningbo 315211, China.

\* Corresponding author, E-mail: xulong@nbu.edu.cn

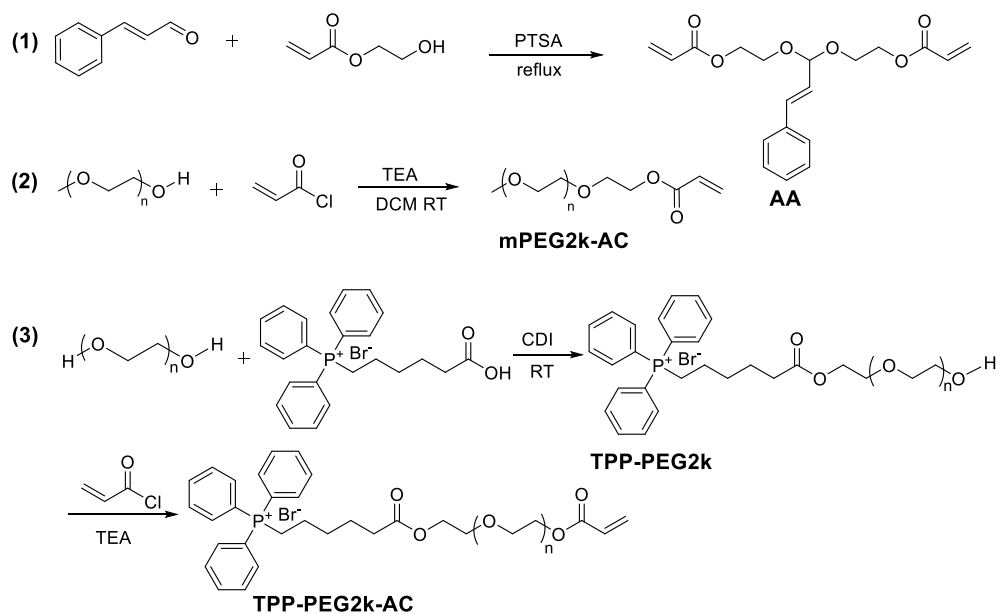

**Scheme S1.** Synthetic scheme of double-end alkenylated acetal AA, capping reagent mPEG2k-AC and TPP-PEG2k-AC.

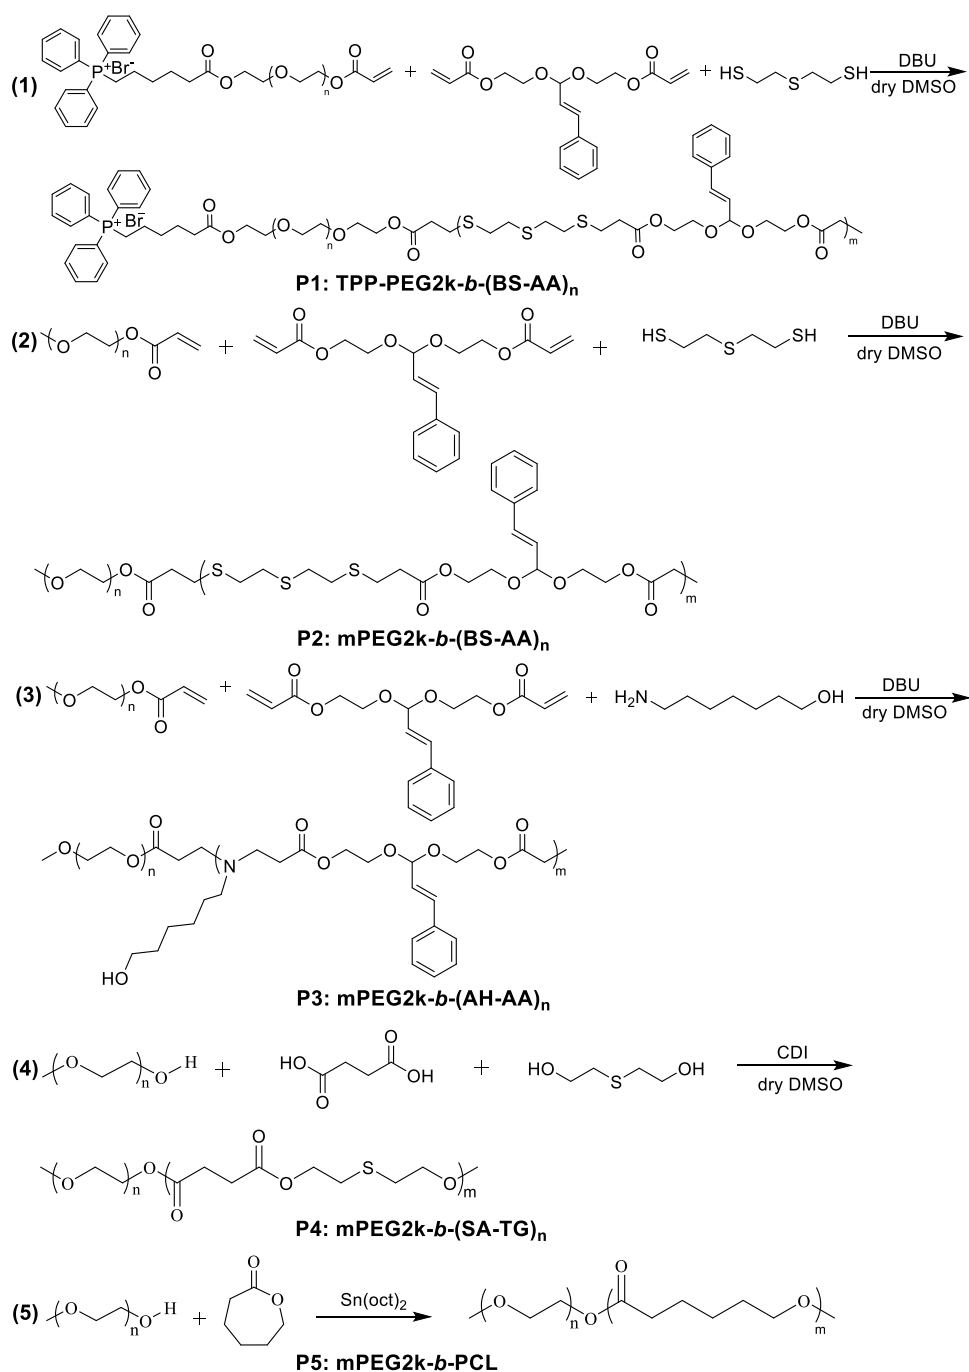

**Scheme S2.** Synthetic scheme of targeting mitochondria ROS/pH dual-responsive polymer P1 (A), ROS/pH dual-responsive polymer P2 (B), pH single-responsive polymer P3 (C), ROS single-responsive polymer P4 (D), and ROS/pH inert control polymer P5 (E).

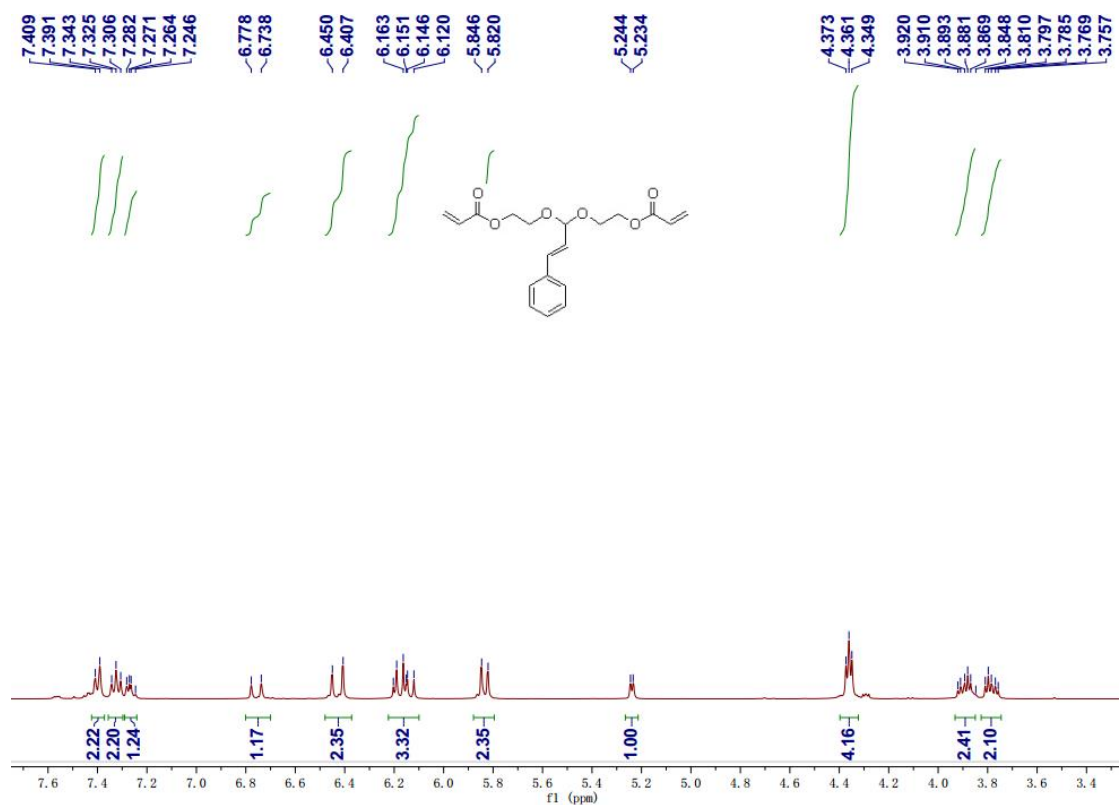

**Figure S1.** <sup>1</sup>H NMR of double-end alkenylated acetal AA.

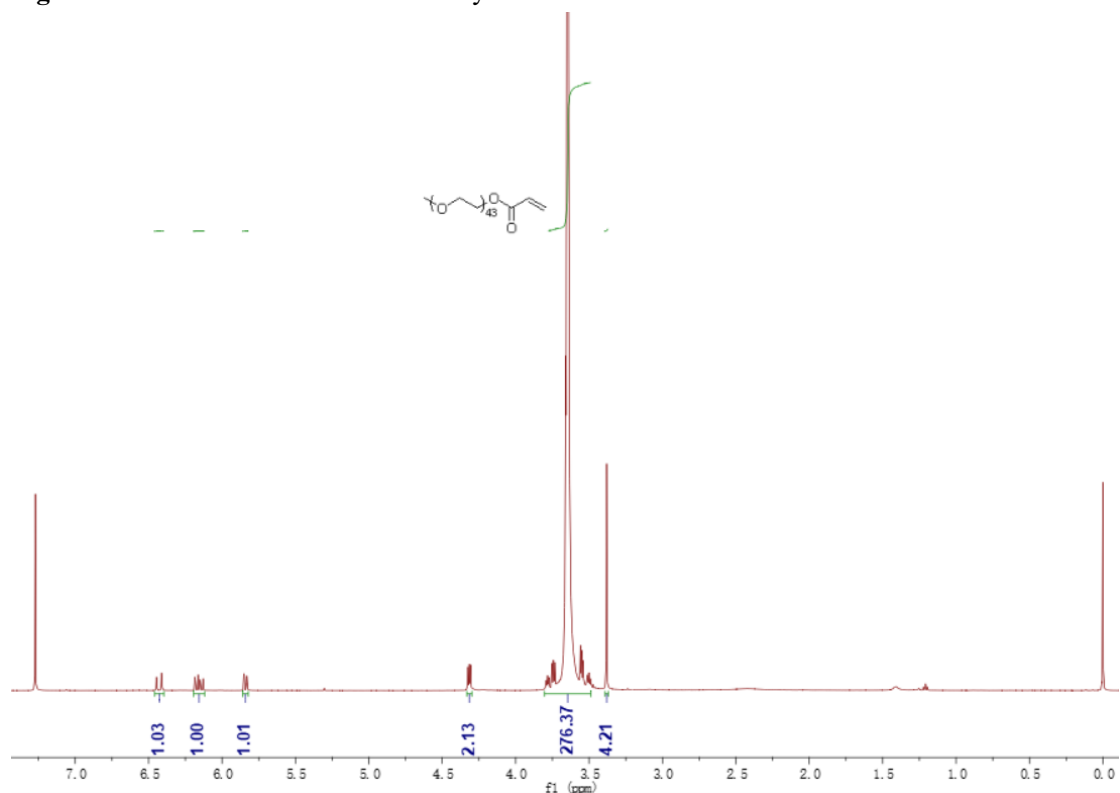

**Figure S2.** <sup>1</sup>H NMR of single-end alkenylated capping reagent mPEG2k-AC.

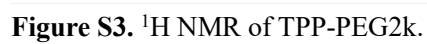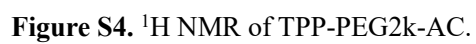

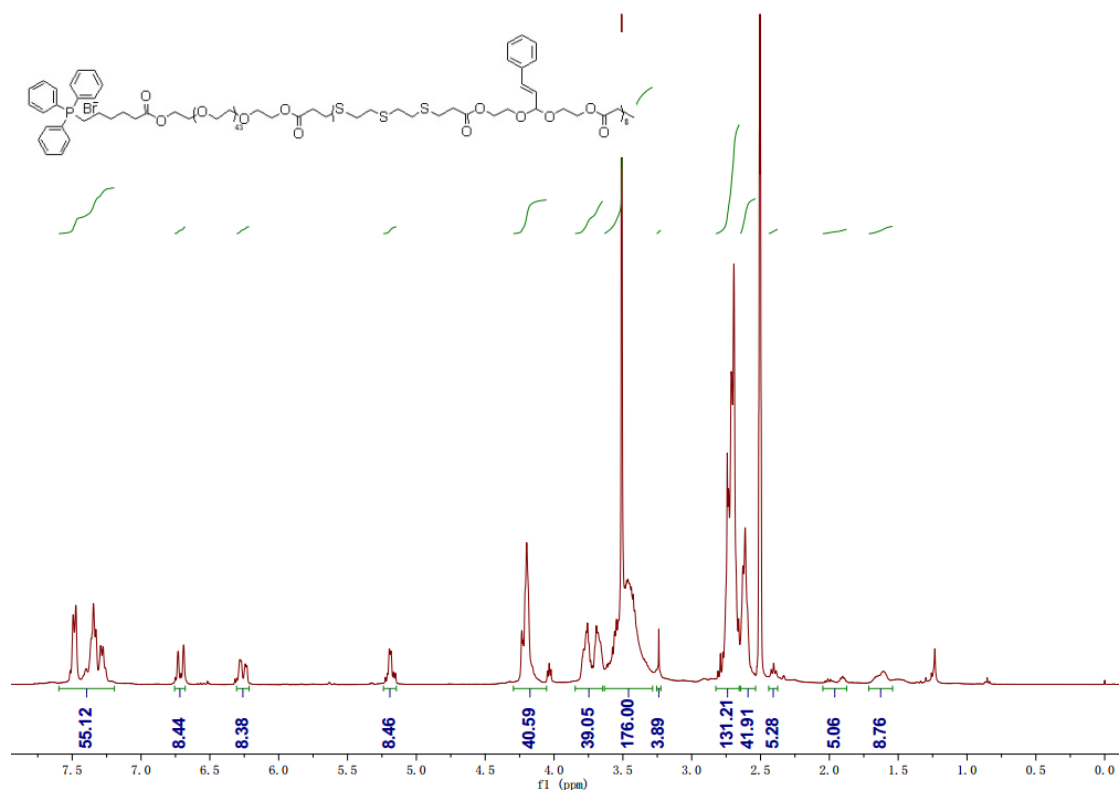

**Figure S5.** <sup>1</sup>H NMR of TPP-PEG-*b*-(BS-AT)<sub>8</sub>.

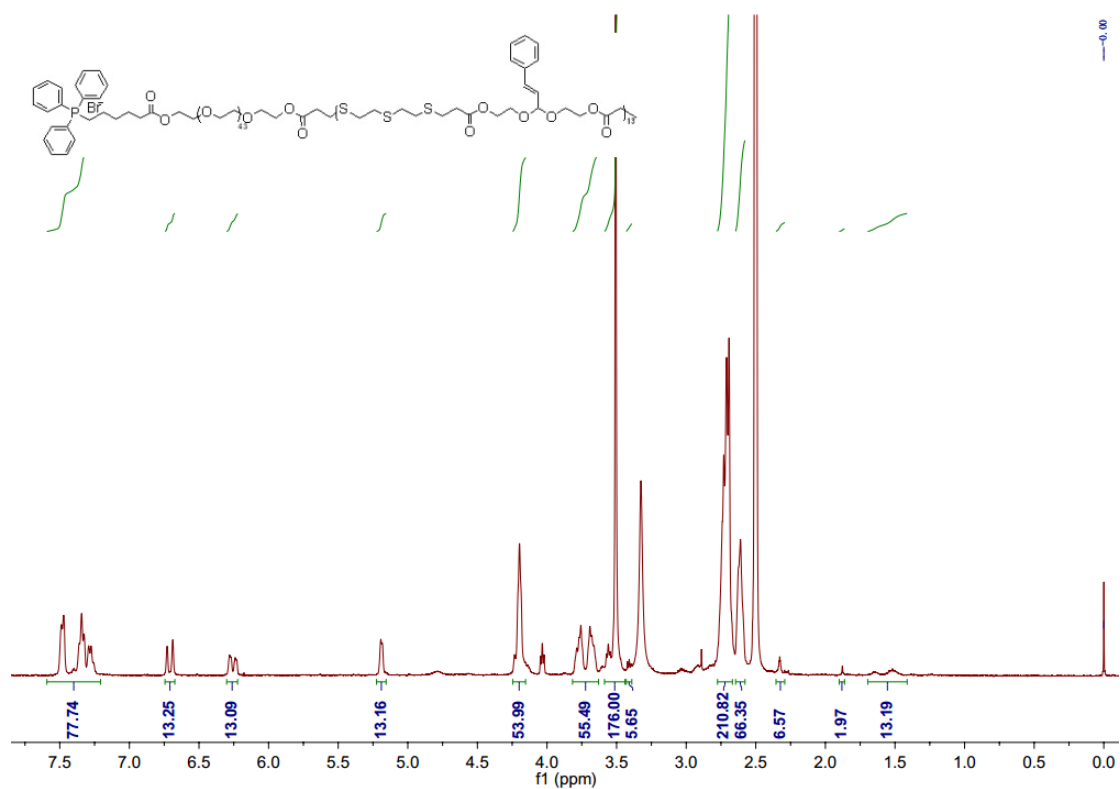

**Figure S6.** <sup>1</sup>H NMR of TPP-PEG-*b*-(BS-AT)<sub>13</sub>.

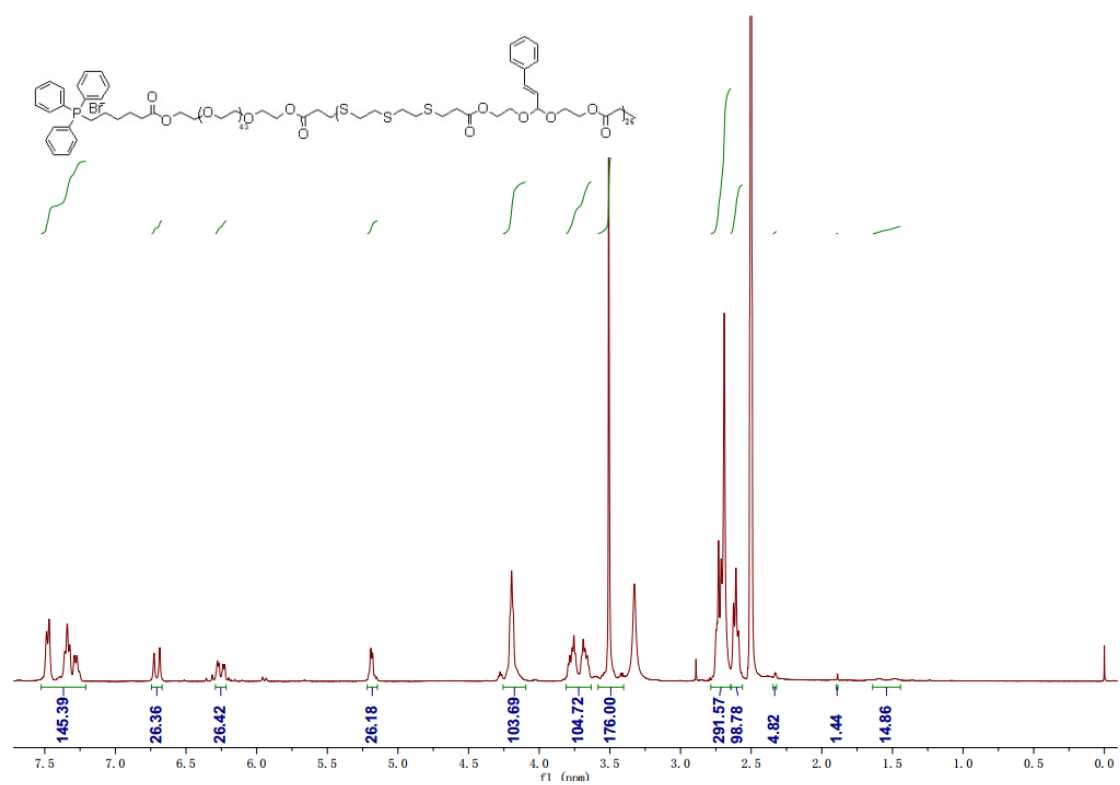

**Figure S7.** <sup>1</sup>H NMR of TPP-PEG-*b*-(BS-AT)<sub>26</sub>.

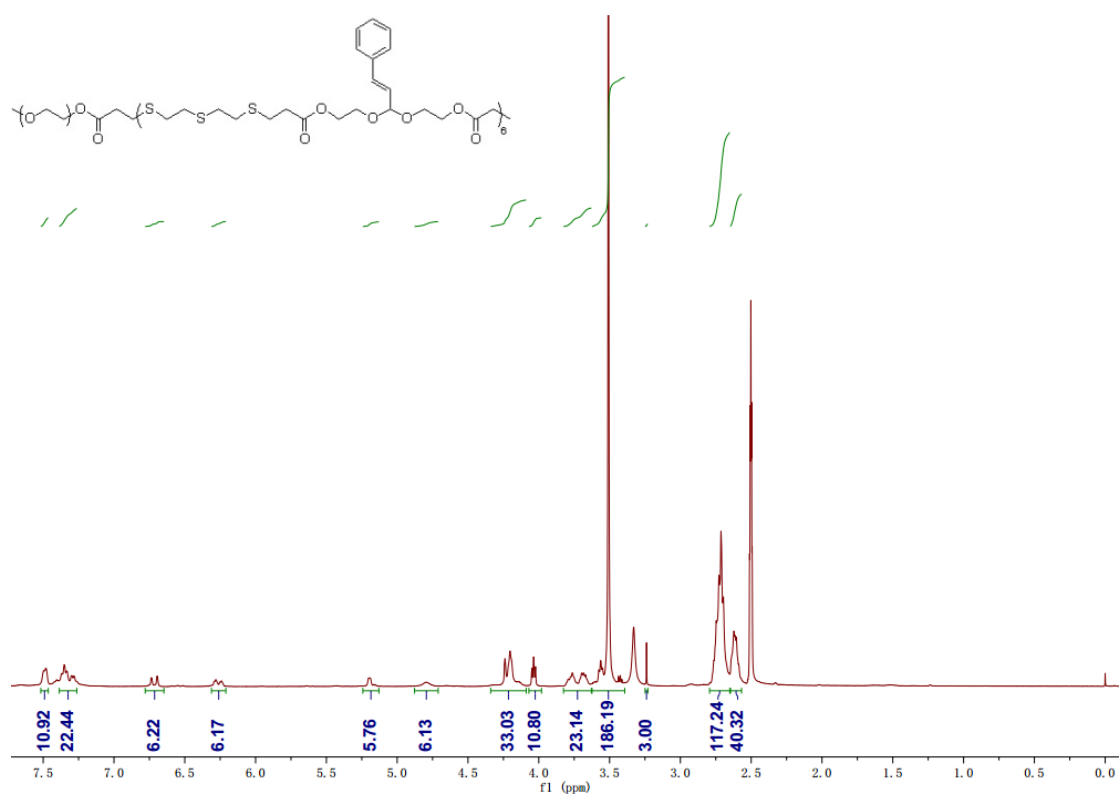

**Figure S8.** <sup>1</sup>H NMR of mPEG-*b*-(BS-AT)<sub>6</sub>.

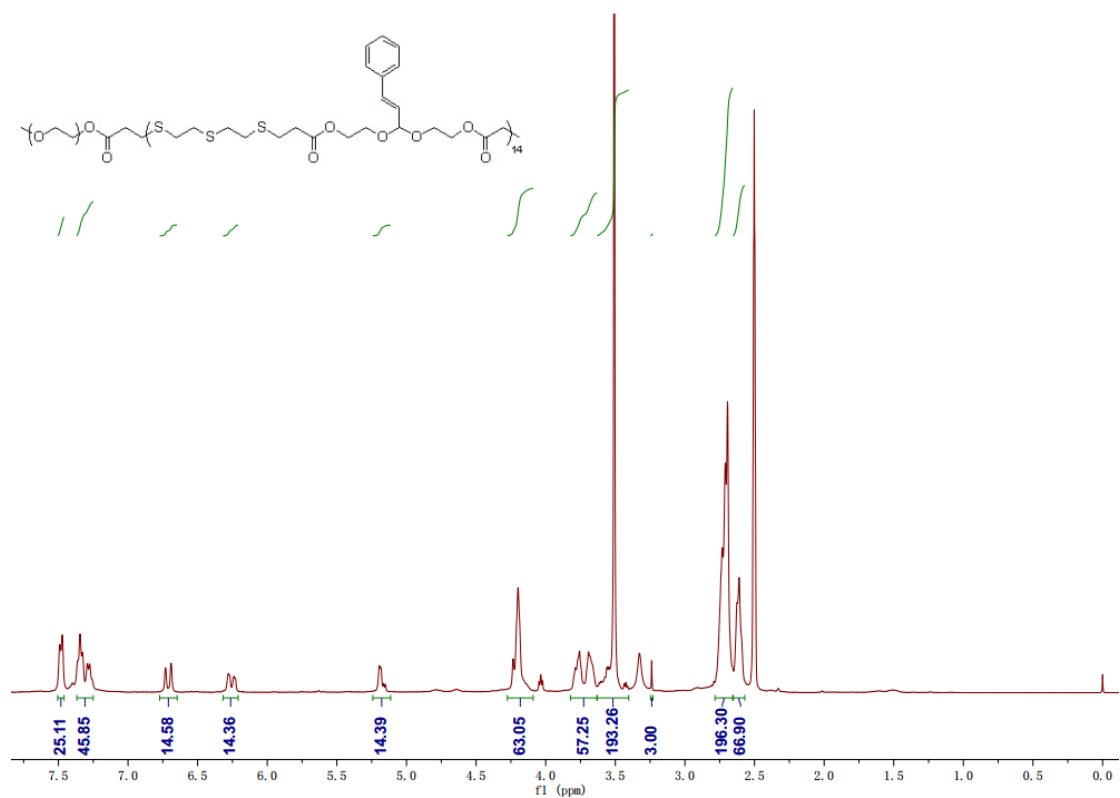

**Figure S9.**  $^1\text{H}$  NMR of  $m\text{PEG}-b\text{-(BS-AT)}_{14}$ .

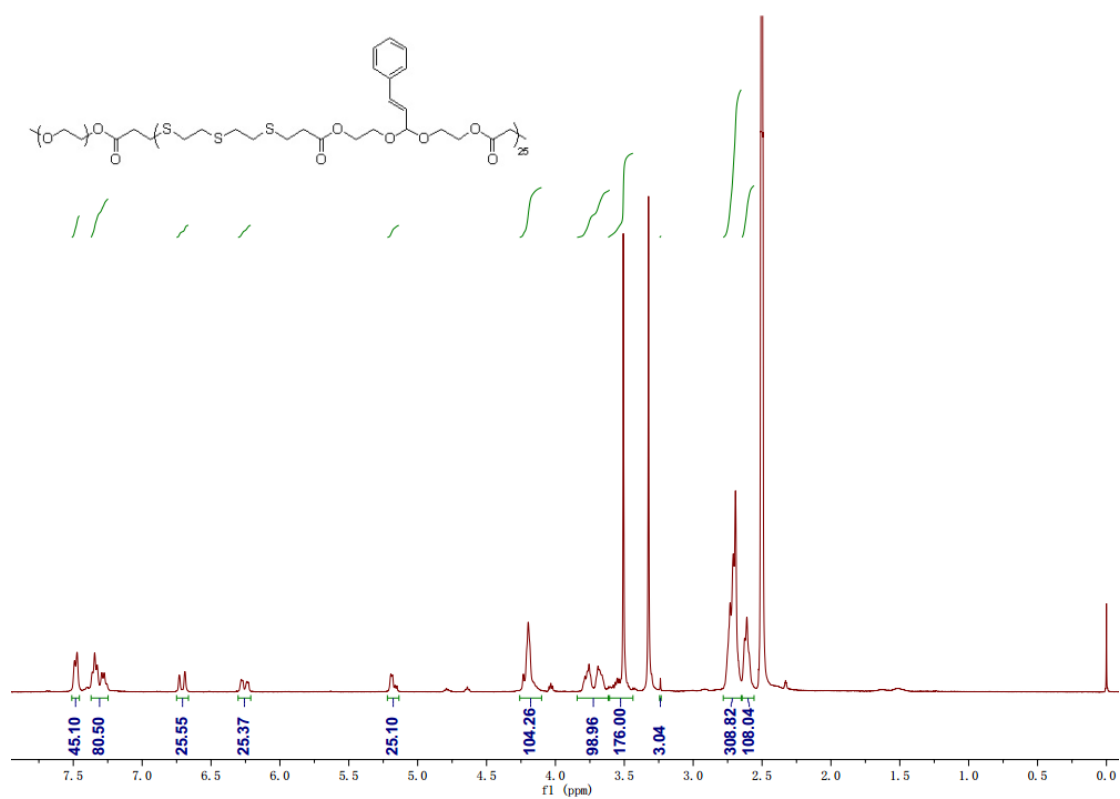

**Figure S10.**  $^1\text{H}$  NMR of  $m\text{PEG}-b\text{-(BS-AT)}_{25}$ .



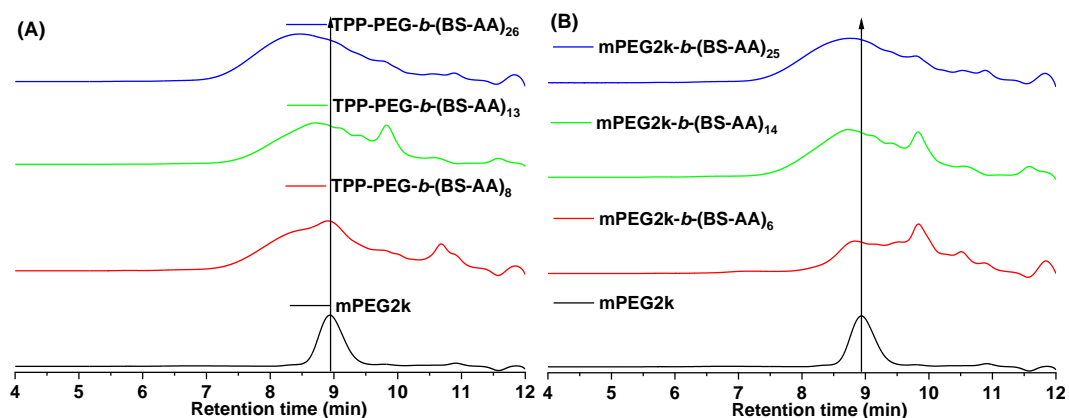

**Figure S11.** GPC traces of copolymer P1 and P2 with different number of repeating unit in DMF.

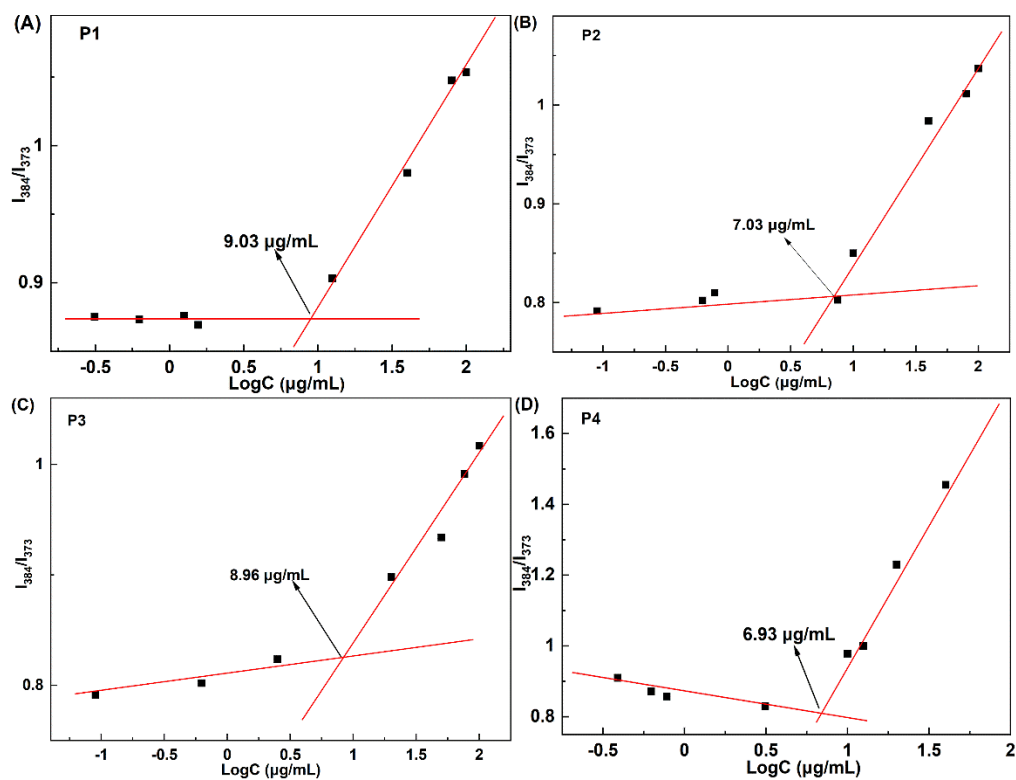

**Figure S12.** CMCs of TPP-PEG2k-*b*-(BS-AA)<sub>13</sub> P1 micelle (A), mPEG2k-*b*-(BS-AA)<sub>14</sub> P2 micelle (B), mPEG2k-*b*-(AH-AA)<sub>10</sub> P3 micelles (C), and mPEG2k-*b*-(SA-TG)<sub>25</sub> P4 micelles.

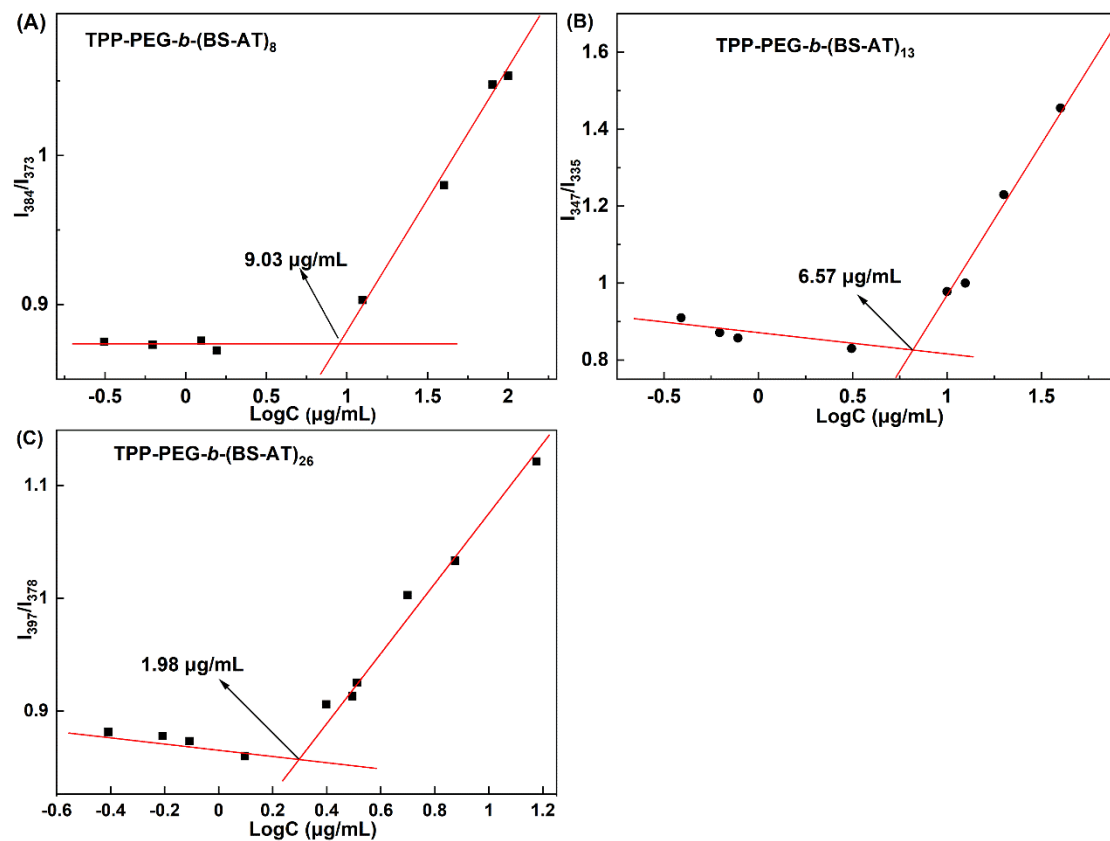

**Figure S13.** CMC of TPP-PEG2k-*b*-(BS-AA)<sub>8</sub> micelle (A), TPP-PEG2k-*b*-(BS-AA)<sub>13</sub> micelle (B), and TPP-PEG2k-*b*-(BS-AA)<sub>26</sub> micelle (C) .

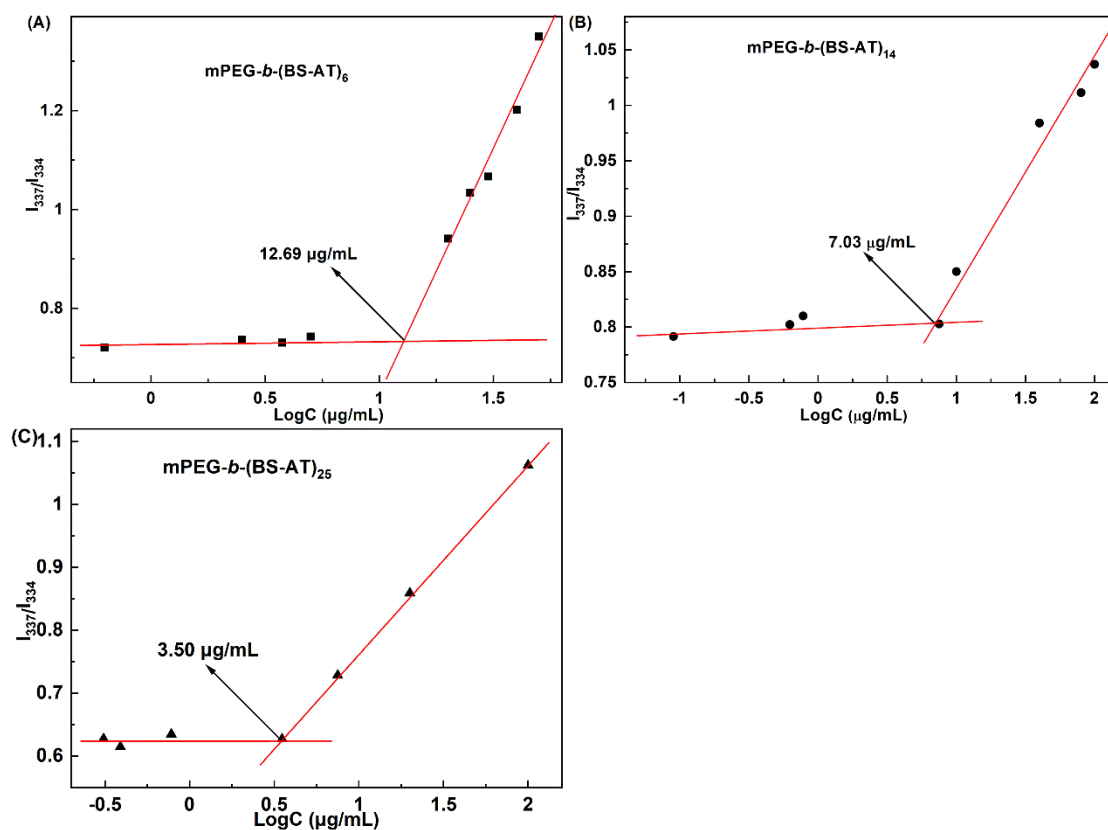

**Figure S14.** CMC of mPEG2k-*b*-(BS-AA)<sub>6</sub> micelle (A), mPEG2k-*b*-(BS-AA)<sub>14</sub> micelle (B), and mPEG2k-*b*-(BS-AA)<sub>25</sub> micelle (C) .

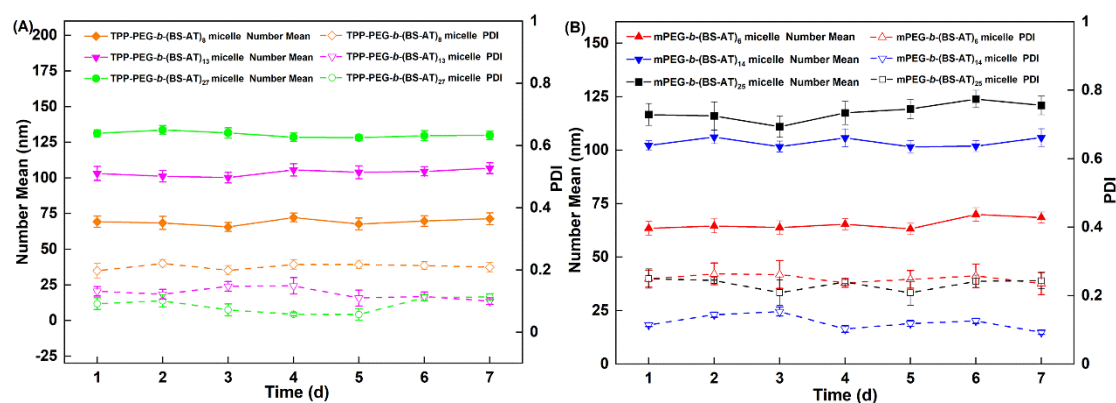

**Figure S15.** Stability of P1 and P2 micelle containing different number of repeating units measured by DLS at 25 °C in PBS (pH 7.4).

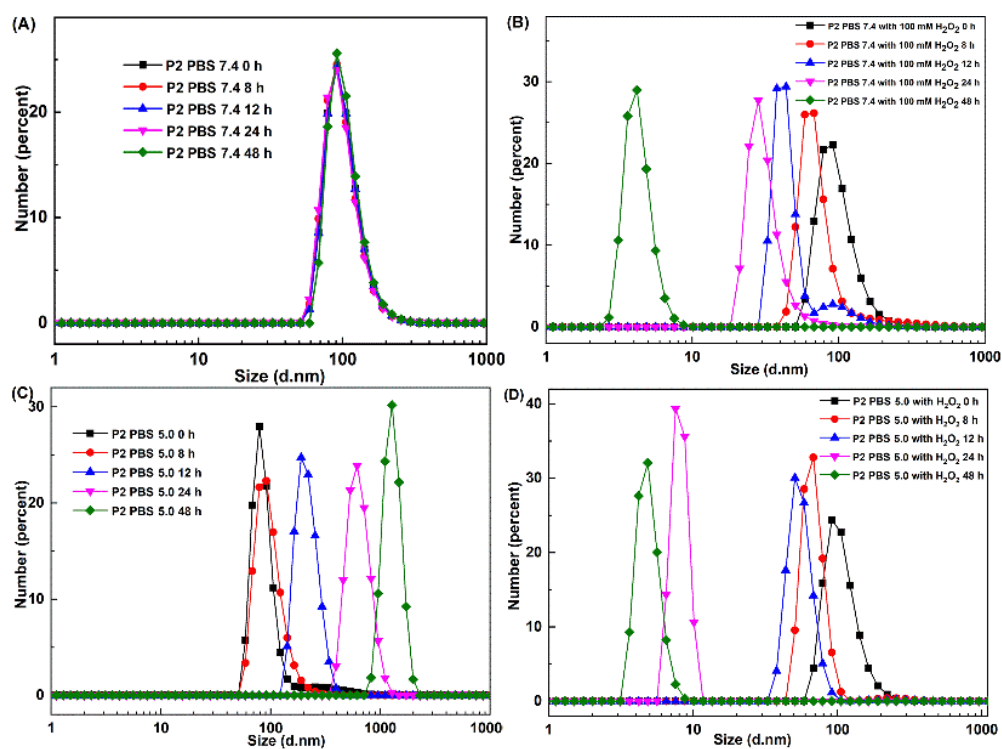

**Figure S16** Size changes of mPEG2k-*b*-(BS-AA)<sub>14</sub> P2 micelle incubated with PBS 7.4 (A), PBS 7.4 with 100 mM H<sub>2</sub>O<sub>2</sub> (B), PBS 5.0 (C), PBS 5.0 with 100 mM H<sub>2</sub>O<sub>2</sub> (D) for different times.

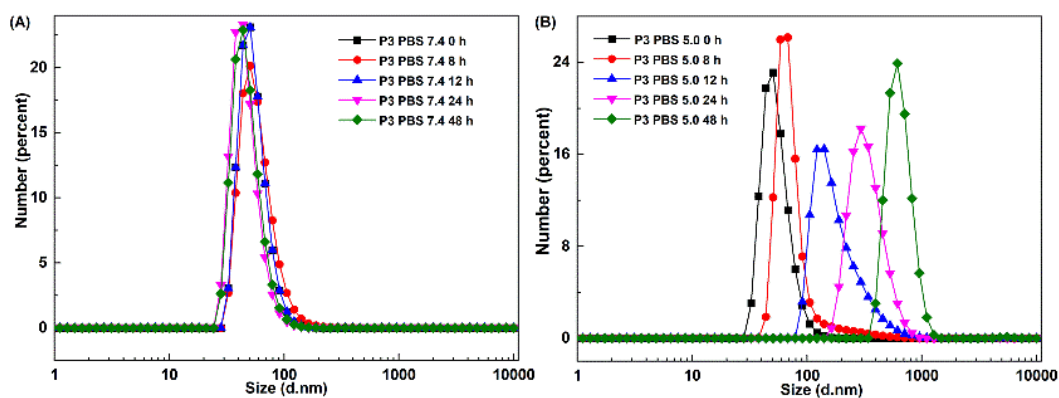

**Figure S17** Size changes of mPEG2k-*b*-(AH-AA)<sub>10</sub> P3 (C) micelle incubated with PBS 7.4 (A) and PBS 5.0 (B) for different times.

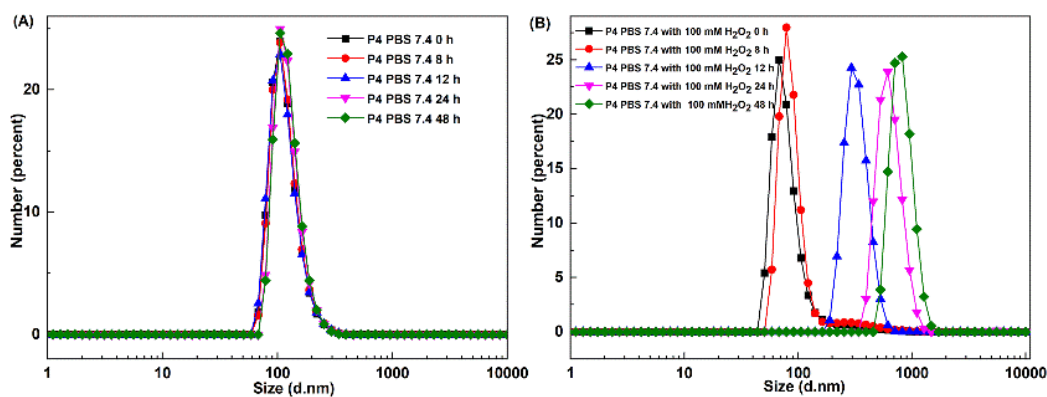

**Figure S18** Size changes of mPEG2k-b-(SA-TG)<sub>25</sub> P4 micelle incubated with PBS 7.4 (A) and PBS 7.4 with 100 mM H<sub>2</sub>O<sub>2</sub> (B) for different times.

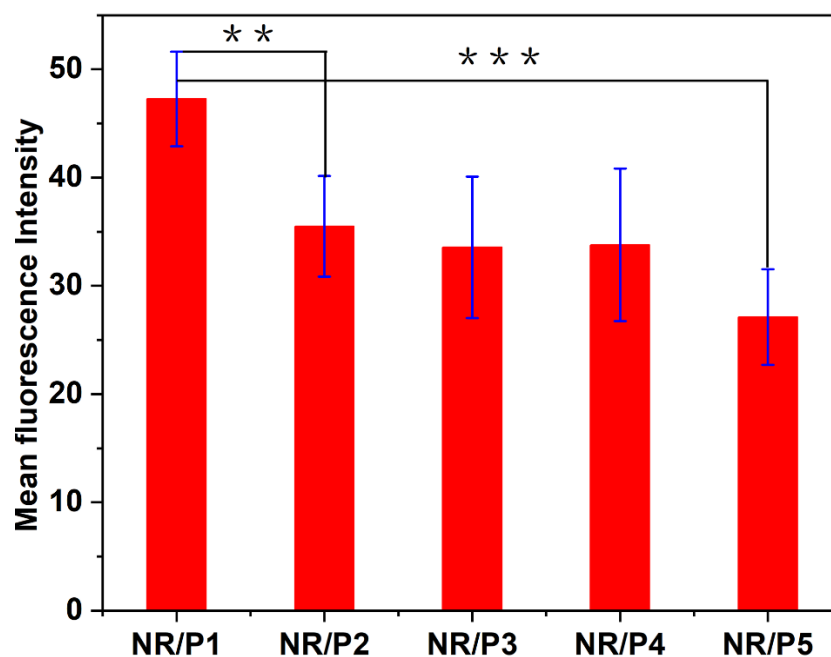

**Figure S19.** The semi-quantitative NR fluorescence intensity of sckov3 cells after treated with NR-loaded P1, P2, P3, P4, and P5 micelles for 6 h. Data are expressed as mean  $\pm$  SD (n=7), statistical difference \*P < 0.05, \*\*P < 0.01, \*\*\*P < 0.001.
